# Supplementary material
Source: PubMed Central journal article supplement (PMC2737960)
Supplement: supp_191_18_5592__1.pdf [file supp_191_18_5592__1.pdf]

**Supplementary Table 1: Full list of *P. aeruginosa* PA14 transposon insertion mutants displaying deficiencies in swarming motility.**

| PA14 locus | PAO1 homolog | Polar effect possible <sup>a</sup> | Gene Name   | Gene Description                                         | Mutant swarm zone relative to PA14 WT |
|------------|--------------|------------------------------------|-------------|----------------------------------------------------------|---------------------------------------|
| PA14_00120 | PA0011       | N <sup>b</sup>                     |             | putative 2-OH-lauroyltransferase                         | less swarm                            |
| PA14_00460 | PA0037       | N <sup>b</sup>                     | <i>trpI</i> | trpBA operon transcriptional activator                   | no swarm                              |
| PA14_00700 | PA0058       | N <sup>b</sup>                     |             | putative protein-disulfide isomerase                     | no swarm                              |
| PA14_00750 | PA0063       | N <sup>b</sup>                     |             | putative aminopeptidase                                  | no swarm                              |
| PA14_00780 | PA0066       | N <sup>b</sup>                     |             | putative carbonic anhydrases                             | no swarm                              |
| PA14_01340 | PA0110       | N <sup>b</sup>                     |             | conserved hypothetical protein                           | no swarm                              |
| PA14_02230 | PA0177       | N <sup>b</sup>                     | <i>cheW</i> | putative purine-binding chemotaxis protein               | no swarm                              |
| PA14_02410 | PA0192       | N <sup>b</sup>                     |             | putative TonB-dependent receptor                         | no swarm                              |
| PA14_04410 | PA0337       | N <sup>b</sup>                     | <i>ptsP</i> | phosphoenolpyruvate-protein phosphotransferase           | no swarm                              |
| PA14_05330 | PA0409       | Y                                  | <i>pilH</i> | type IV pilus response regulator PilH                    | less swarm                            |
| PA14_05340 | PA0410       | Y                                  | <i>pilI</i> | type IV pili signal transduction protein PilI            | no swarm                              |
| PA14_05360 | PA0411       | N <sup>b</sup>                     | <i>pilJ</i> | type IV pili methyl-accepting chemotaxis transducer PilJ | less swarm                            |
| PA14_05380 | PA0412       | N <sup>b</sup>                     | <i>pilK</i> | methyltransferase PilK                                   | no swarm                              |
| PA14_05450 | PA0419       | N <sup>b</sup>                     |             | conserved hypothetical protein                           | no swarm                              |
| PA14_05560 | PA0428       | N <sup>b</sup>                     |             | putative ATP-dependent RNA helicase, DEAD box family     | no swarm                              |
| PA14_06210 | PA0475       | N <sup>b</sup>                     |             | putative transcriptional regulator                       | no swarm                              |
| PA14_06260 | PA0479       | N <sup>b</sup>                     |             | putative transcriptional regulator, LysR family          | no swarm                              |
| PA14_06830 | PA0524       | N <sup>b</sup>                     | <i>norB</i> | nitric-oxide reductase subunit B                         | no swarm                              |
| PA14_07170 | PA0551       | N <sup>b</sup>                     | <i>epd</i>  | D-erythrose 4-phosphate dehydrogenase                    | less swarm                            |
| PA14_07370 | PA0567       | N <sup>b</sup>                     |             | conserved hypothetical protein                           | no swarm                              |
| PA14_07530 | PA0577       | N <sup>b</sup>                     | <i>dnaG</i> | putative DNA primase                                     | no swarm                              |
| PA14_07700 | PA0590       | N <sup>b</sup>                     | <i>apaH</i> | bis(5'-nucleosyl)-tetrphosphatase                        | no swarm                              |
| PA14_07710 | PA0591       | Y                                  |             | putative apaG protein                                    | no swarm                              |
| PA14_08210 | PA0633       | N <sup>b</sup>                     |             | putative major tail protein V                            | no swarm                              |
| PA14_08500 | PA0664       | N <sup>b</sup>                     |             | putative integral membrane protein                       | no swarm                              |
| PA14_54540 | PA0754       | N <sup>b</sup>                     |             | conserved hypothetical protein                           | no swarm                              |
| PA14_54520 | PA0755       | Y                                  |             | probable porin                                           | less swarm                            |
| PA14_53520 | PA0831       | N <sup>b</sup>                     | <i>oruR</i> | transcriptional regulator OruR                           | no swarm                              |
| PA14_53430 | PA0837       | N <sup>b</sup>                     | <i>slyD</i> | peptidyl-prolyl cis-trans isomerase SlyD                 | less swarm                            |
| PA14_53300 | PA0848       | N <sup>b</sup>                     |             | probable alkyl hydroperoxide reductase                   | less swarm                            |
| PA14_52730 | PA0894       | N <sup>b</sup>                     |             | hypothetical protein                                     | no swarm                              |
| PA14_52570 | PA0905       | N <sup>b</sup>                     | <i>rsmA</i> | RsmA, regulator of secondary metabolites                 | no swarm                              |
| PA14_52280 | PA0926       | N <sup>b</sup>                     |             | hypothetical protein                                     | no swarm                              |

|            |        |                |             |                                                  |            |
|------------|--------|----------------|-------------|--------------------------------------------------|------------|
| PA14_52260 | PA0928 | Y              | <i>gacS</i> | sensor/response regulator hybrid                 | no swarm   |
| PA14_52210 | PA0932 | N <sup>b</sup> | <i>cysM</i> | cysteine synthase B                              | no swarm   |
| PA14_51390 | PA0999 | N <sup>b</sup> | <i>pqsD</i> | 3-oxoacyl-[acyl-carrier-protein] synthase III    | no swarm   |
| PA14_51360 | PA1001 | N <sup>b</sup> | <i>phnA</i> | anthranilate synthase component I                | no swarm   |
| PA14_50560 | PA1070 | N <sup>b</sup> | <i>braG</i> | branched-chain amino acid transport protein BraG | less swarm |
| PA14_50470 | PA1078 | N <sup>b</sup> | <i>flgC</i> | flagellar basal-body rod protein FlgC            | no swarm   |
| PA14_50290 | PA1092 | N <sup>b</sup> | <i>fliC</i> | flagellin type B                                 | no swarm   |
| PA14_50280 | PA1093 | N <sup>b</sup> |             | hypothetical protein                             | no swarm   |
| PA14_50270 | PA1094 | N <sup>b</sup> | <i>fliD</i> | flagellar capping protein FliD                   | no swarm   |
| PA14_50130 | PA1102 | Y              | <i>fliG</i> | flagellar motor switch protein FliG              | no swarm   |
| PA14_50110 | PA1103 | N <sup>b</sup> |             | probable flagellar assembly protein              | no swarm   |
| PA14_49800 | PA1127 | N <sup>b</sup> |             | probable oxidoreductase                          | less swarm |
| PA14_49320 | PA1167 | N <sup>b</sup> |             | Hypothetical                                     | no swarm   |
| PA14_49280 | PA1171 | N <sup>b</sup> |             | probable transglycolase                          | no swarm   |
| PA14_49170 | PA1180 | N <sup>b</sup> | <i>phoQ</i> | two-component sensor PhoQ                        | no swarm   |
| PA14_48830 | PA1196 | N <sup>b</sup> |             | putative transcriptional regulator               | no swarm   |
| PA14_48280 | PA1237 | N <sup>b</sup> |             | putative multidrug resistance efflux pump        | no swarm   |
| PA14_46850 | PA1347 | N <sup>b</sup> |             | putative transcriptional regulator               | no swarm   |
| PA14_46440 | PA1377 | N <sup>b</sup> |             | putative acetyltransferase                       | no swarm   |
| PA14_46060 | PA1422 | N <sup>b</sup> | <i>gbuR</i> | transcriptional regulator                        | no swarm   |
| PA14_45950 | PA1431 | N <sup>b</sup> | <i>rsaL</i> | regulatory protein RsaL                          | less swarm |
| PA14_45810 | PA1442 | Y              |             | putative flagellar protein FliL                  | no swarm   |
| PA14_45770 | PA1446 | Y              | <i>fliP</i> | flagellar biosynthetic protein FliP              | no swarm   |
| PA14_45760 | PA1447 | Y              | <i>fliQ</i> | flagellar biosynthetic protein FliQ              | no swarm   |
| PA14_45720 | PA1449 | N <sup>b</sup> | <i>flhB</i> | flagellar biosynthetic protein FlhB              | no swarm   |
| PA14_45680 | PA1452 | Y              | <i>flhA</i> | flagellar biosynthesis protein FlhA              | no swarm   |
| PA14_45660 | PA1453 | Y              | <i>flhF</i> | flagellar biosynthesis protein FlhF              | no swarm   |
| PA14_45590 | PA1458 | N <sup>b</sup> |             | putative two-component sensor                    | no swarm   |
| PA14_45500 | PA1464 | N <sup>b</sup> |             | putative purine-binding chemotaxis protein CheW  | no swarm   |
| PA14_45120 | PA1492 | N <sup>b</sup> |             | hypothetical protein                             | no swarm   |
| PA14_44490 | PA1544 | N <sup>b</sup> | <i>anr</i>  | transcriptional regulator Anr                    | less swarm |
| PA14_44370 | PA1554 | N <sup>b</sup> | <i>ccoN</i> | cytochrome oxidase subunit (cbb3-type)           | less swarm |
| PA14_43420 | PA1631 | N <sup>b</sup> |             | putative acyl-CoA dehydrogenase                  | no swarm   |
| PA14_41710 | PA1767 | N <sup>b</sup> |             | putative membrane protein                        | less swarm |
| PA14_41220 | PA1803 | N <sup>b</sup> | <i>lon</i>  | Lon protease                                     | no swarm   |
| PA14_40900 | PA1827 | N <sup>b</sup> |             | putative short-chain dehydrogenase               | no swarm   |
| PA14_40670 | PA1843 | N <sup>b</sup> | <i>metH</i> | methionine synthase                              | no swarm   |
| PA14_40620 | PA1848 | N <sup>b</sup> |             | putative MFS transporter                         | no swarm   |
| PA14_39070 | PA1969 | N <sup>b</sup> |             | conserved hypothetical protein                   | no swarm   |
| PA14_38970 | PA1976 | N <sup>b</sup> |             | putative sensor histidine kinase protein         | less swarm |
| PA14_38350 | PA2023 | N <sup>b</sup> | <i>galU</i> | UTP-glucose-1-phosphate uridylyltransferase      | less swarm |
| PA14_37690 | PA2072 | N <sup>b</sup> |             | putative sensory box protein                     | no swarm   |
| PA14_37370 | PA2098 | N <sup>b</sup> |             | putative esterase                                | no swarm   |
| PA14_36310 | PA2195 | N <sup>b</sup> | <i>hcnC</i> | hydrogen cyanide synthase HcnC                   | no swarm   |

|            |        |                |              |                                                             |            |
|------------|--------|----------------|--------------|-------------------------------------------------------------|------------|
| PA14_35550 | PA2245 | N <sup>b</sup> |              | hypothetical protein                                        | less swarm |
| PA14_34450 | PA2332 | N <sup>b</sup> |              | putative transcriptional regulator, AraC family             | less swarm |
| PA14_33890 | PA2379 | N <sup>b</sup> |              | putative oxidoreductase                                     | no swarm   |
| PA14_33650 | PA2399 | N <sup>b</sup> | <i>pvdD</i>  | pyoverdine synthetase D                                     | no swarm   |
| PA14_33500 | PA2413 | N <sup>b</sup> | <i>pvdH</i>  | 2-ketoglutarate 4-aminotransferase                          | no swarm   |
| PA14_33290 | PA2423 | N <sup>b</sup> |              | Hypothetical                                                | less swarm |
| PA14_33010 | PA2444 | N <sup>b</sup> | <i>glyA2</i> | serine hydroxymethyltransferase                             | no swarm   |
| PA14_32860 | PA2455 | N <sup>b</sup> |              | hypothetical protein                                        | no swarm   |
| PA14_32520 | PA2483 | N <sup>b</sup> |              | putative flavin-dependent oxidoreductase                    | no swarm   |
| PA14_30840 | PA2571 | N <sup>b</sup> |              | putative signal transduction histidine kinase               | no swarm   |
| PA14_30660 | PA2585 | N <sup>b</sup> | <i>uvrC</i>  | excinuclease ABC subunit C                                  | less swarm |
| PA14_30650 | PA2586 | Y              | <i>gacA</i>  | response regulator GacA                                     | hyperswarm |
| PA14_30630 | PA2587 | N <sup>b</sup> | <i>pqsH</i>  | probable FAD-dependent monooxygenase                        | hyperswarm |
| PA14_30290 | PA2615 | N <sup>b</sup> | <i>ftsK</i>  | cell division/stress response protein                       | no swarm   |
| PA14_30200 | PA2622 | N <sup>b</sup> | <i>cspD</i>  | cold-shock protein CspD                                     | hyperswarm |
| PA14_30100 | PA2630 | N <sup>b</sup> |              | conserved hypothetical protein                              | less swarm |
| PA14_29830 | PA2650 | N <sup>b</sup> |              | putative methyltransferase                                  | no swarm   |
| PA14_29390 | PA2685 | N <sup>b</sup> |              | conserved hypothetical protein                              | no swarm   |
| PA14_28950 | PA2722 | N <sup>b</sup> |              | conserved hypothetical protein                              | no swarm   |
| PA14_27580 | PA2821 | N <sup>b</sup> |              | putative glutathione S-transferase                          | hyperswarm |
| PA14_27090 | PA2863 | N <sup>b</sup> | <i>lipH</i>  | lipase modulator protein                                    | no swarm   |
| PA14_26670 | PA2891 | N <sup>b</sup> | <i>atuF</i>  | putative biotin carboxylase/biotin carboxyl carrier protein | no swarm   |
| PA14_26640 | PA2893 | N <sup>b</sup> | <i>atuH</i>  | putative very-long-chain acyl-CoA synthetase                | no swarm   |
| PA14_26460 | PA2909 | N <sup>b</sup> | <i>cobK</i>  | ppfam02571, CbiJ, Precorrin-6x reductase                    | no swarm   |
| PA14_25800 | PA2957 | N <sup>b</sup> |              | putative transcriptional regulator, TetR family             | no swarm   |
| PA14_25420 | PA2989 | N <sup>b</sup> |              | conserved hypothetical protein                              | no swarm   |
| PA14_25110 | PA3011 | N <sup>b</sup> | <i>topA</i>  | DNA topoisomerase I                                         | no swarm   |
| PA14_24180 | PA3091 | N <sup>b</sup> |              | conserved hypothetical protein                              | no swarm   |
| PA14_23830 | PA3115 | N <sup>b</sup> | <i>fimV</i>  | pilus assembly protein                                      | no swarm   |
| PA14_23470 | PA3141 | N <sup>b</sup> | <i>wbpM</i>  | nucleotide sugar epimerase/dehydratase WbpM                 | no swarm   |
| PA14_23170 | PA3175 | N <sup>b</sup> |              | putative arginase family protein                            | less swarm |
| PA14_22020 | PA3244 | N <sup>b</sup> | <i>minD</i>  | cell division inhibitor MinD                                | no swarm   |
| PA14_21340 | PA3300 | N <sup>b</sup> | <i>fadD2</i> | long-chain-fatty-acid--CoA ligase                           | no swarm   |
| PA14_21320 | PA3301 | N <sup>b</sup> |              | putative lysophospholipase                                  | less swarm |
| PA14_21110 | PA3319 | N <sup>b</sup> | <i>plcN</i>  | non-hemolytic phospholipase C precursor                     | less swarm |
| PA14_20870 | PA3339 | N <sup>b</sup> |              | putative membrane protein                                   | less swarm |
| PA14_20630 | PA3359 | N <sup>b</sup> |              | conserved hypothetical protein                              | no swarm   |
| PA14_20290 | PA3385 | Y              |              | DNA binding-protein                                         | no swarm   |
| PA14_20280 | PA3386 | N <sup>b</sup> |              | conserved hypothetical protein                              | less swarm |
| PA14_20230 | PA3391 | N <sup>b</sup> | <i>nosR</i>  | NosR Regulatory protein for N2O                             | less swarm |

|            |        |                |              |                                                            |            |
|------------|--------|----------------|--------------|------------------------------------------------------------|------------|
|            |        |                |              | reductase                                                  |            |
| PA14_20110 | PA3400 | N <sup>b</sup> |              | putative ABC-type multidrug transport permease             | no swarm   |
| PA14_19630 | PA3438 | N <sup>b</sup> | <i>folE1</i> | GTP cyclohydrolase I precursor                             | no swarm   |
| PA14_19130 | PA3476 | N <sup>b</sup> | <i>rhlI</i>  | autoinducer synthesis protein RhlI                         | no swarm   |
| PA14_19120 | PA3477 | N <sup>b</sup> | <i>rhlR</i>  | acylhomoserine lactone dependent transcriptional regulator | no swarm   |
| PA14_18960 | PA3488 | N <sup>b</sup> |              | hypothetical protein                                       | no swarm   |
| PA14_17900 | PA3587 | N <sup>b</sup> | <i>metR</i>  | transcriptional regulator MetR                             | less swarm |
| PA14_17450 | PA3625 | N <sup>b</sup> | <i>surE</i>  | putative stationary-phase survival protein SurE            | no swarm   |
| PA14_17410 | PA3628 | N <sup>b</sup> |              | putative esterase                                          | no swarm   |
| PA14_17370 | PA3631 | N <sup>b</sup> |              | putative transport permease protein                        | no swarm   |
| PA14_16890 | PA3670 | N <sup>b</sup> |              | putative auxiliary component of ABC transporter            | no swarm   |
| PA14_16040 | PA3738 | N <sup>b</sup> | <i>xerD</i>  | integrase/recombinase XerD                                 | no swarm   |
| PA14_15920 | PA3749 | N <sup>b</sup> |              | putative major facilitator family transporter              | no swarm   |
| PA14_15180 | PA3781 | N <sup>b</sup> |              | putative ABC transport system, membrane protein            | no swarm   |
| PA14_14850 | PA3805 | N <sup>b</sup> | <i>pilF</i>  | type 4 fimbrial biogenesis protein PilF                    | no swarm   |
| PA14_14500 | PA3828 | N <sup>b</sup> |              | putative permease                                          | no swarm   |
| PA14_14210 | PA3850 | N <sup>b</sup> |              | hypothetical protein                                       | no swarm   |
| PA14_13510 | PA3895 | N <sup>b</sup> |              | putative transcriptional regulator, LysR family            | no swarm   |
| PA14_12030 | PA4005 | N <sup>b</sup> |              | conserved hypothetical protein                             | no swarm   |
| PA14_11970 | PA4010 | N <sup>b</sup> |              | methylpurine-DNA glycosylase family protein                | no swarm   |
| PA14_11940 | PA4012 | N <sup>b</sup> |              | hypothetical protein                                       | no swarm   |
| PA14_10440 | PA4137 | N <sup>b</sup> |              | putative porin                                             | no swarm   |
| PA14_10330 | PA4144 | N <sup>b</sup> |              | putative outer membrane protein precursor                  | no swarm   |
| PA14_09970 | PA4168 | N <sup>b</sup> |              | putative TonB-dependent receptor                           | less swarm |
| PA14_09750 | PA4186 | N <sup>b</sup> |              | putative oxidoreductase                                    | no swarm   |
| PA14_09300 | PA4223 | N <sup>b</sup> |              | putative ATP-binding component of ABC transporter          | less swarm |
| PA14_55770 | PA4292 | N <sup>b</sup> |              | putative probable phosphate transporter                    | less swarm |
| PA14_55920 | PA4304 | N <sup>b</sup> | <i>rcpA</i>  | putative type II secretion system protein                  | no swarm   |
| PA14_56070 | PA4315 | N <sup>b</sup> | <i>mvaT</i>  | transcriptional regulator MvaT, P16 subunit                | less swarm |
| PA14_56640 | PA4355 | N <sup>b</sup> |              | putative MFS transporter                                   | no swarm   |
| PA14_56730 | PA4362 | N <sup>b</sup> |              | conserved hypothetical protein                             | no swarm   |
| PA14_57070 | PA4391 | N <sup>b</sup> |              | conserved hypothetical protein                             | no swarm   |
| PA14_57100 | PA4393 | N <sup>b</sup> |              | putative permease                                          | no swarm   |
| PA14_57170 | PA4398 | Y              |              | putative two-component response regulator                  | no swarm   |
| PA14_57180 | PA4399 | N <sup>b</sup> |              | putative cob(I)alamin adenosyltransferase                  | less swarm |
| PA14_57480 | PA4423 | N <sup>b</sup> |              | putative lipoprotein                                       | less swarm |

|            |        |                |             |                                                  |            |
|------------|--------|----------------|-------------|--------------------------------------------------|------------|
| PA14_58050 | PA4472 | N <sup>b</sup> | <i>pmbA</i> | PmbA protein                                     | no swarm   |
| PA14_58070 | PA4474 | N <sup>b</sup> |             | putative tldD protein                            | no swarm   |
| PA14_58470 | PA4505 | N <sup>b</sup> | <i>dppD</i> | putative dipeptide ABC transporter               | no swarm   |
| PA14_58560 | PA4513 | N <sup>b</sup> |             | Sulfite reductase                                | no swarm   |
| PA14_60210 | PA4544 | N <sup>b</sup> | <i>rluD</i> | ribosomal large subunit pseudouridine synthase D | less swarm |
| PA14_60960 | PA4607 | N <sup>b</sup> |             | conserved hypothetical protein                   | no swarm   |
| PA14_61080 | PA4616 | N <sup>b</sup> |             | putative C4-dicarboxylate-binding protein        | no swarm   |
| PA14_61320 | PA4634 | N <sup>b</sup> |             | conserved hypothetical protein                   | less swarm |
| PA14_61720 | PA4667 | N <sup>b</sup> |             | conserved hypothetical protein                   | no swarm   |
| PA14_62130 | PA4694 | N <sup>b</sup> | <i>ilvC</i> | ketol-acid reductoisomerase                      | no swarm   |
| PA14_62530 | PA4725 | N <sup>b</sup> | <i>cbrA</i> | two-component sensor CbrA                        | no swarm   |
| PA14_62710 | PA4740 | N <sup>b</sup> | <i>pnp</i>  | polyribonucleotide nucleotidyltransferase        | less swarm |
| PA14_62870 | PA4752 | N <sup>b</sup> | <i>ftsJ</i> | cell division protein FtsJ                       | no swarm   |
| PA14_62900 | PA4755 | N <sup>b</sup> | <i>greA</i> | transcription elongation factor GreA             | no swarm   |
| PA14_63170 | PA4778 | N <sup>b</sup> |             | putative transcriptional regulator               | no swarm   |
| PA14_63370 | PA4796 | N <sup>b</sup> |             | putative glycine cleavage system H protein       | less swarm |
| PA14_63680 | PA4817 | N <sup>b</sup> |             | conserved hypothetical protein                   | no swarm   |
| PA14_63710 | PA4819 | N <sup>b</sup> |             | putative glycosyl transferase                    | no swarm   |
| PA14_63860 | PA4830 | N <sup>b</sup> |             | conserved hypothetical protein                   | no swarm   |
| PA14_64030 | PA4842 | N <sup>b</sup> |             | conserved hypothetical protein                   | no swarm   |
| PA14_64170 | PA4851 | Y              |             | conserved hypothetical protein                   | no swarm   |
| PA14_64180 | PA4852 | Y              |             | putative tRNA-dihydrouridine synthase            | no swarm   |
| PA14_64190 | PA4853 | N <sup>b</sup> | <i>fis</i>  | DNA-binding protein Fis                          | no swarm   |
| PA14_64590 | PA4887 | N <sup>b</sup> |             | putative MFS transporter                         | no swarm   |
| PA14_64930 | PA4916 | N <sup>b</sup> |             | putative ADP-ribose pyrophosphatase              | no swarm   |
| PA14_65170 | PA4934 | N <sup>b</sup> | <i>rpsR</i> | 30S ribosomal protein S18                        | less swarm |
| PA14_65320 | PA4945 | N <sup>b</sup> | <i>miaA</i> | delta 2-isopentenylpyrophosphate transferase     | no swarm   |
| PA14_65420 | PA4952 | N <sup>b</sup> |             | putative GTPase                                  | no swarm   |
| PA14_65520 | PA4958 | N <sup>b</sup> |             | conserved hypothetical protein                   | less swarm |
| PA14_65990 | PA4990 | N <sup>b</sup> | <i>qacH</i> | putative SMR multidrug efflux transporter        | no swarm   |
| PA14_66120 | PA5001 | N <sup>b</sup> |             | conserved hypothetical protein                   | less swarm |
| PA14_66140 | PA5002 | Y              |             | conserved hypothetical protein                   | no swarm   |
| PA14_66640 | PA5042 | N <sup>b</sup> | <i>pilO</i> | type 4 fimbrial biogenesis protein PilO          | no swarm   |
| PA14_66660 | PA5044 | Y              | <i>pilM</i> | type 4 fimbrial biogenesis protein PilM          | no swarm   |
| PA14_67090 | PA5078 | N <sup>b</sup> |             | periplasmic glucan biosynthesis protein, MdoG    | no swarm   |
| PA14_67240 | PA5091 | N <sup>b</sup> | <i>hutG</i> | N-formylglutamate amidohydrolase                 | no swarm   |
| PA14_67420 | PA5105 | Y              | <i>hutC</i> | histidine utilization genes repressor protein    | no swarm   |
| PA14_67670 | PA5124 | Y              | <i>ntrB</i> | two-component sensor NtrB                        | no swarm   |
| PA14_67680 | PA5125 | N <sup>b</sup> | <i>ntrC</i> | two-component response regulator NtrC            | no swarm   |
| PA14_67810 | PA5134 | N <sup>b</sup> |             | putative carboxyl-terminal protease              | less swarm |
| PA14_69090 | PA5232 | N <sup>b</sup> |             | putative membrane fusion protein                 | less swarm |
| PA14_69190 | PA5239 | N <sup>b</sup> | <i>rho</i>  | transcription termination factor Rho             | no swarm   |

|            |        |                |               |                                                                           |            |
|------------|--------|----------------|---------------|---------------------------------------------------------------------------|------------|
| PA14_69220 | PA5241 | N <sup>b</sup> | <i>ppx</i>    | exopolyphosphatase                                                        | less swarm |
| PA14_69470 | PA5261 | N <sup>b</sup> | <i>algR</i>   | alginate biosynthesis regulatory protein AlgR                             | less swarm |
| PA14_69560 | PA5267 | N <sup>b</sup> | <i>hcpA</i>   | secreted protein Hcp                                                      | no swarm   |
| PA14_70180 | PA5315 | N <sup>b</sup> | <i>rpmG</i>   | 50S ribosomal protein L33                                                 | less swarm |
| PA14_70570 | PA5345 | N <sup>b</sup> | <i>recG</i>   | ATP-dependent DNA helicase RecG                                           | no swarm   |
| PA14_70850 | PA5368 | N <sup>b</sup> | <i>pstC</i>   | phosphate ABC transporter, permease protein                               | no swarm   |
| PA14_71000 | PA5376 | N <sup>b</sup> |               | putative lysine betaine/L-proline ABC transporter, ATP-binding subunit    | no swarm   |
| PA14_71030 | PA5378 | N <sup>b</sup> |               | putative glycine betaine/L-proline ABC transporter, periplasmic component | no swarm   |
| PA14_72000 | PA5454 | N <sup>b</sup> | <i>rmd</i>    | oxidoreductase Rmd                                                        | no swarm   |
| PA14_72490 | PA5493 | N <sup>b</sup> | <i>polA</i>   | DNA polymerase I                                                          | less swarm |
| PA14_72620 | PA5503 | N <sup>b</sup> |               | putative ATP-binding component of ABC transporter                         | less swarm |
| PA14_73020 | PA5536 | Y              |               | putative C4-type zinc finger protein, DksA/TraR family                    | less swarm |
| PA14_73120 | PA5545 | N <sup>b</sup> |               | putative periplasmic transport protein                                    | no swarm   |
| PA14_07480 |        | N/A            |               | putative reverse transcriptase                                            | no swarm   |
| PA14_14350 |        | N/A            |               | hypothetical protein                                                      | no swarm   |
| PA14_15450 |        | N/A            | <i>merD</i>   | Mercuric resistance transcriptional repressor protein MerD                | less swarm |
| PA14_17160 |        | N/A            |               | hypothetical protein                                                      | no swarm   |
| PA14_17750 |        | N/A            |               | hypothetical protein                                                      | no swarm   |
| PA14_23430 |        | N/A            | <i>ORF_11</i> | putative heparinase                                                       | less swarm |
| PA14_23460 |        | N/A            | <i>wbpL</i>   | putative glycosyltransferase L                                            | no swarm   |
| PA14_24360 |        | N/A            |               | putative serine protease                                                  | no swarm   |
| PA14_30120 |        | N/A            |               | hypothetical protein                                                      | no swarm   |
| PA14_30210 |        | N/A            |               | putative cytoplasmic protease                                             | no swarm   |
| PA14_32960 |        | N/A            |               | hypothetical protein                                                      | no swarm   |
| PA14_48120 |        | N/A            |               | hypothetical protein                                                      | no swarm   |
| PA14_54970 |        | N/A            |               | probable ABC transporter protein                                          | no swarm   |
| PA14_56280 |        | N/A            |               | conserved hypothetical protein                                            | no swarm   |
| PA14_56610 |        | N/A            |               | hypothetical protein                                                      | no swarm   |
| PA14_58760 |        | N/A            | <i>pilC</i>   | type 4 fimbrial biogenesis protein pilC                                   | less swarm |
| PA14_59060 |        | N/A            |               | putative DNA binding protein                                              | no swarm   |
| PA14_59560 |        | N/A            |               | transposase                                                               | less swarm |
| PA14_60060 |        | N/A            |               | hypothetical protein                                                      | no swarm   |
| PA14_60290 |        | N/A            | <i>pilW</i>   | type 4 fimbrial biogenesis protein PilW                                   | no swarm   |
| PA14_60310 |        | N/A            | <i>pilY1</i>  | type 4 fimbrial biogenesis protein PilY1                                  | no swarm   |
| PA14_61380 |        | N/A            |               | conserved hypothetical protein                                            | no swarm   |
| PA14_62030 |        | N/A            |               | putative paraquat-inducible protein A                                     | no swarm   |
| PA14_63610 |        | N/A            |               | hypothetical protein                                                      | no swarm   |
| PA14_67070 |        | N/A            |               | hypothetical protein                                                      | no swarm   |
| PA14_69920 |        | N/A            |               | hypothetical protein                                                      | no swarm   |

Transposon mutants are organized in ascending order of PAO1 ortholog. The list represents all of the swarming deficient mutants verified on BM2 swarm agar plates. No swarm, surface coverage of mutant relative to PA14 WT is < 25 %; Less swarm, surface coverage of mutants relative to PA14 WT is < 50 %; Hyper-swarm, surface coverage of mutant relative to PA14 WT is > 25 %. <sup>a</sup> Possibility of transposon insertion affecting expression on downstream genes. Y, yes; N, no; N/A, not applicable. <sup>b</sup> No evidence for polar effect identified from our screens.
