# Supplementary material
Source: PubMed Central journal article supplement (PMC2737960)
Supplement: supp_191_18_5592__2.pdf [file supp_191_18_5592__2.pdf]

**Supplementary Table 2: Full list of *P. aeruginosa* genes with expression up- or down-regulated in the *metR* mutant compared to the PA14 wild-type.**

| Gene   | Name        | Function                                          | Liquid swarming condition |         | Semi-viscous swarming condition |         |
|--------|-------------|---------------------------------------------------|---------------------------|---------|---------------------------------|---------|
|        |             |                                                   | Fold change               | P-value | Fold change                     | P-value |
| PA0044 | <i>exoT</i> | exoenzyme T                                       |                           |         | -2.08                           | 0.010   |
| PA0045 |             | hypothetical protein                              |                           |         | -3.43                           | 0.022   |
| PA0047 |             | hypothetical protein                              |                           |         | -2.23                           | 0.025   |
| PA0051 | <i>phzH</i> | potential phenazine-modifying enzyme              |                           |         | 3.62                            | 0.002   |
| PA0096 |             | hypothetical protein                              |                           |         | -5.82                           | 0.008   |
| PA0103 |             | probable sulfate transporter                      |                           |         | 3.69                            | 0.000   |
| PA0137 |             | probable permease of ABC transporter              |                           |         | 2.01                            | 0.040   |
| PA0208 | <i>mdcA</i> | malonate decarboxylase alpha subunit              |                           |         | -2.40                           | 0.004   |
| PA0248 |             | probable transcriptional regulator                |                           |         | -2.72                           | 0.029   |
| PA0252 |             | hypothetical protein                              |                           |         | -4.28                           | 0.001   |
| PA0293 | <i>aguB</i> | N-carbamoylputrescine amidohydrolase              |                           |         | 2.30                            | 0.004   |
| PA0298 | <i>spuB</i> | probable glutamine synthetase                     |                           |         | -4.22                           | 0.012   |
| PA0326 |             | probable ATP-binding component of ABC transporter |                           |         | 2.17                            | 0.002   |
| PA0430 | <i>metF</i> | 5,10-methylenetetrahydrofolate reductase          |                           |         | -2.08                           | 0.013   |
| PA0434 |             | hypothetical protein                              |                           |         | 2.33                            | 0.043   |
| PA0523 | <i>norC</i> | nitric-oxide reductase subunit C                  |                           |         | 2.37                            | 0.010   |
| PA0588 |             | putative protein kinase                           | -2.06                     | 0.000   |                                 |         |
| PA0606 |             | probable permease of ABC transporter              |                           |         | -2.39                           | 0.040   |
| PA0610 | <i>priN</i> | transcriptional regulator PrtN                    |                           |         | 2.84                            | 0.000   |
| PA0612 |             | hypothetical protein                              |                           |         | 11.27                           | 0.000   |
| PA0613 |             | hypothetical protein                              |                           |         | 5.45                            | 0.000   |
| PA0614 |             | hypothetical protein                              |                           |         | 4.98                            | 0.002   |
| PA0615 |             | hypothetical protein                              |                           |         | 4.65                            | 0.000   |
| PA0616 |             | hypothetical protein                              |                           |         | 5.44                            | 0.000   |
| PA0617 |             | probable bacteriophage protein                    |                           |         | 6.37                            | 0.000   |
| PA0618 |             | probable bacteriophage protein                    |                           |         | 5.29                            | 0.001   |
| PA0619 |             | probable bacteriophage protein                    |                           |         | 8.07                            | 0.000   |
| PA0620 |             | probable bacteriophage protein                    |                           |         | 6.66                            | 0.000   |
| PA0621 |             | hypothetical protein                              |                           |         | 3.13                            | 0.010   |
| PA0622 |             | probable bacteriophage protein                    |                           |         | 6.17                            | 0.000   |
| PA0623 |             | probable bacteriophage protein                    |                           |         | 6.86                            | 0.000   |
| PA0624 |             | hypothetical protein                              |                           |         | 5.44                            | 0.000   |

|        |              |                                                          |       |       |        |       |
|--------|--------------|----------------------------------------------------------|-------|-------|--------|-------|
| PA0625 |              | hypothetical protein                                     |       |       | 5.45   | 0.000 |
| PA0626 |              | hypothetical protein                                     |       |       | 5.35   | 0.000 |
| PA0627 |              | hypothetical protein                                     |       |       | 7.09   | 0.000 |
| PA0628 |              | hypothetical protein                                     |       |       | 5.85   | 0.000 |
| PA0629 |              | hypothetical protein                                     |       |       | 7.03   | 0.000 |
| PA0630 |              | hypothetical protein                                     |       |       | 5.93   | 0.001 |
| PA0631 |              | hypothetical protein                                     |       |       | 8.65   | 0.000 |
| PA0633 |              | hypothetical protein                                     |       |       | 9.28   | 0.000 |
| PA0634 |              | hypothetical protein                                     |       |       | 6.22   | 0.000 |
| PA0635 |              | hypothetical protein                                     |       |       | 6.42   | 0.000 |
| PA0636 |              | hypothetical protein                                     |       |       | 5.93   | 0.000 |
| PA0637 |              | hypothetical protein                                     |       |       | 5.24   | 0.000 |
| PA0638 |              | probable bacteriophage protein                           |       |       | 6.60   | 0.000 |
| PA0639 |              | hypothetical protein                                     |       |       | 8.23   | 0.000 |
| PA0647 |              | hypothetical protein                                     |       |       | 2.66   | 0.026 |
| PA0671 |              | hypothetical protein                                     |       |       | 2.13   | 0.002 |
| PA0703 |              | probable major facilitator superfamily (MFS) transporter |       |       | -2.07  | 0.011 |
| PA0707 | <i>toxR</i>  | transcriptional regulator ToxR                           |       |       | -5.38  | 0.000 |
| PA0713 |              | hypothetical protein                                     |       |       | -2.63  | 0.032 |
| PA0717 |              | hypothetical protein of bacteriophage Pf1                | 10.08 | 0.000 | 342.12 | 0.000 |
| PA0718 |              | hypothetical protein of bacteriophage Pf1                | 5.74  | 0.000 | 271.30 | 0.000 |
| PA0719 |              | hypothetical protein of bacteriophage Pf1                |       |       | 109.98 | 0.000 |
| PA0720 |              | helix destabilizing protein of bacteriophage Pf1         | 24.11 | 0.000 | 325.95 | 0.000 |
| PA0721 |              | hypothetical protein of bacteriophage Pf1                |       |       | 375.78 | 0.000 |
| PA0723 | <i>coaB</i>  | coat protein B of bacteriophage Pf1                      | 91.94 | 0.000 |        |       |
| PA0725 |              | hypothetical protein of bacteriophage Pf1                | 3.69  | 0.000 | 7.01   | 0.000 |
| PA0726 |              | hypothetical protein of bacteriophage Pf1                |       |       | 47.72  | 0.000 |
| PA0727 |              | hypothetical protein from bacteriophage Pf1              |       |       | 11.96  | 0.000 |
| PA0730 |              | probable transferase                                     |       |       | 2.44   | 0.002 |
| PA0775 |              | conserved hypothetical protein                           | 2.56  | 0.003 |        |       |
| PA0807 |              | hypothetical protein                                     |       |       | 3.10   | 0.000 |
| PA0848 |              | probable alkyl hydroperoxide reductase                   |       |       | 2.12   | 0.008 |
| PA0865 | <i>hpd</i>   | 4-hydroxyphenylpyruvate dioxygenase                      | 5.38  | 0.023 |        |       |
| PA0866 | <i>aroP2</i> | aromatic amino acid transport protein AroP2              | 2.51  | 0.002 |        |       |
| PA0906 |              | probable transcriptional regulator                       |       |       | 2.92   | 0.025 |
| PA0908 |              | hypothetical protein                                     |       |       | 3.08   | 0.029 |
| PA0909 |              | hypothetical protein                                     |       |       | 2.94   | 0.010 |
| PA0910 |              | hypothetical protein                                     | -3.99 | 0.000 |        |       |
| PA0913 | <i>mgtE</i>  | probable Mg transporter MgtE                             |       |       | 2.72   | 0.005 |

|        |              |                                                                               |       |       |       |       |
|--------|--------------|-------------------------------------------------------------------------------|-------|-------|-------|-------|
| PA0929 |              | two-component response regulator                                              |       |       | -3.33 | 0.019 |
| PA0979 |              | hypothetical protein                                                          |       |       | -3.37 | 0.019 |
| PA0994 | <i>cupC3</i> | usher CupC3                                                                   | -2.50 | 0.003 |       |       |
| PA1035 |              | hypothetical protein                                                          |       |       | -2.54 | 0.035 |
| PA1178 | <i>oprH</i>  | PhoP/Q and low Mg <sup>2+</sup> inducible outer membrane protein H1 precursor |       |       | 3.37  | 0.000 |
| PA1267 |              | hypothetical protein                                                          |       |       | -4.50 | 0.011 |
| PA1286 |              | putative MFS transporter                                                      | -2.10 | 0.000 |       |       |
| PA1317 | <i>cyoA</i>  | cytochrome o ubiquinol oxidase subunit II                                     |       |       | -3.17 | 0.002 |
| PA1318 | <i>cyoB</i>  | cytochrome o ubiquinol oxidase subunit I                                      |       |       | -2.15 | 0.006 |
| PA1319 | <i>cyoC</i>  | cytochrome o ubiquinol oxidase subunit III                                    |       |       | -2.41 | 0.000 |
| PA1320 | <i>cyoD</i>  | cytochrome o ubiquinol oxidase subunit IV                                     |       |       | -3.26 | 0.001 |
| PA1321 | <i>cyoE</i>  | cytochrome o ubiquinol oxidase protein CyoE                                   |       |       | -2.25 | 0.002 |
| PA1326 | <i>ilvA2</i> | threonine dehydratase, biosynthetic                                           |       |       | 3.19  | 0.002 |
| PA1327 |              | probable protease                                                             |       |       | 2.01  | 0.012 |
| PA1343 |              | hypothetical protein                                                          |       |       | 2.58  | 0.026 |
| PA1421 | <i>gbuA</i>  | guanidinobutyrase                                                             | 2.11  | 0.008 |       |       |
| PA1466 |              | hypothetical protein                                                          |       |       | 2.44  | 0.011 |
| PA1498 | <i>pykF</i>  | pyruvate kinase I                                                             | 7.07  | 0.000 |       |       |
| PA1539 |              | hypothetical protein                                                          |       |       | -3.95 | 0.014 |
| PA1541 |              | probable drug efflux transporter                                              |       |       | -2.48 | 0.037 |
| PA1542 |              | hypothetical protein                                                          |       |       | 2.43  | 0.039 |
| PA1549 |              | probable cation-transporting P-type ATPase                                    |       |       | -2.31 | 0.044 |
| PA1566 |              | hypothetical protein                                                          |       |       | 2.08  | 0.010 |
| PA1600 |              | probable cytochrome c                                                         |       |       | -3.86 | 0.015 |
| PA1601 |              | probable aldehyde dehydrogenase                                               |       |       | -3.21 | 0.021 |
| PA1626 |              | probable major facilitator superfamily (MFS) transporter                      |       |       | 2.53  | 0.035 |
| PA1637 | <i>kdpE</i>  | two-component response regulator KdpE                                         |       |       | -2.37 | 0.041 |
| PA1691 | <i>pscT</i>  | translocation protein in type III secretion                                   | 2.71  | 0.002 |       |       |
| PA1693 | <i>pscR</i>  | translocation protein in type III secretion                                   | 2.52  | 0.003 |       |       |
| PA1695 | <i>pscP</i>  | translocation protein in type III secretion                                   |       |       | -3.85 | 0.015 |
| PA1696 | <i>pscO</i>  | translocation protein in type III secretion                                   |       |       | 21.12 | 0.002 |
| PA1699 |              | conserved hypothetical protein in type III secretion                          |       |       | -3.57 | 0.017 |
| PA1705 | <i>pcrG</i>  | regulator in type III secretion                                               |       |       | -2.19 | 0.007 |
| PA1708 | <i>popB</i>  | translocator protein PopB                                                     | 2.16  | 0.005 |       |       |
| PA1710 | <i>exsC</i>  | exoenzyme S synthesis protein C precursor                                     | 2.26  | 0.000 |       |       |
| PA1716 | <i>pscC</i>  | Type III secretion outer membrane protein PscC precursor                      | 2.42  | 0.001 | -2.11 | 0.001 |
| PA1717 | <i>pscD</i>  | type III export protein PscD                                                  |       |       | -2.80 | 0.012 |

|        |             |                                                       |      |       |       |       |
|--------|-------------|-------------------------------------------------------|------|-------|-------|-------|
| PA1718 | <i>pscE</i> | type III export protein PscE                          |      |       | -7.61 | 0.005 |
| PA1719 | <i>pscF</i> | type III export protein PscF                          |      |       | -2.19 | 0.002 |
| PA1721 | <i>pscH</i> | type III export protein PscH                          |      |       | -3.50 | 0.002 |
| PA1723 | <i>pscJ</i> | type III export protein PscJ                          | 2.00 | 0.001 |       |       |
| PA1724 | <i>pscK</i> | type III export protein PscK                          |      |       | -2.32 | 0.002 |
| PA1740 |             | hypothetical protein                                  |      |       | -2.83 | 0.027 |
| PA1778 | <i>cobA</i> | uroporphyrin-III C-methyltransferase                  |      |       | 2.10  | 0.001 |
| PA1781 | <i>nirB</i> | assimilatory nitrite reductase large subunit          |      |       | 4.34  | 0.001 |
| PA1785 |             | hypothetical protein                                  |      |       | 4.14  | 0.000 |
| PA1799 |             | putative two-component response regulator             | 3.06 | 0.001 |       |       |
| PA1823 | <i>nudC</i> | NADH pyrophosphatase                                  |      |       | 9.50  | 0.004 |
| PA1842 |             | hypothetical protein                                  |      |       | -3.26 | 0.000 |
| PA1843 | <i>metH</i> | methionine synthase                                   |      |       | -2.90 | 0.001 |
| PA1863 | <i>modA</i> | molybdate-binding periplasmic protein precursor ModA  |      |       | 2.61  | 0.032 |
| PA1879 |             | hypothetical protein                                  |      |       | -2.02 | 0.016 |
| PA1882 |             | probable transporter                                  |      |       | 3.31  | 0.001 |
| PA1888 |             | hypothetical protein                                  |      |       | -2.31 | 0.044 |
| PA1925 |             | hypothetical protein                                  |      |       | -2.41 | 0.039 |
| PA1971 | <i>braZ</i> | branched chain amino acid transporter BraZ            |      |       | -4.83 | 0.010 |
| PA1977 |             | hypothetical protein                                  |      |       | -2.73 | 0.029 |
| PA2014 | <i>gnyB</i> | beta subunit of geranyl-CoA carboxylase, GnyB         |      |       | -2.00 | 0.005 |
| PA2030 |             | hypothetical protein                                  |      |       | 2.55  | 0.000 |
| PA2041 |             | probable amino acid permease                          |      |       | -4.16 | 0.013 |
| PA2056 |             | probable transcriptional regulator                    |      |       | 2.16  | 0.019 |
| PA2082 |             | probable transcriptional regulator                    |      |       | -3.72 | 0.016 |
| PA2083 |             | probable ring-hydroxylating dioxygenase subunit       |      |       | 2.30  | 0.045 |
| PA2086 |             | probable epoxide hydrolase                            |      |       | -5.41 | 0.009 |
| PA2088 |             | hypothetical protein                                  |      |       | -7.93 | 0.005 |
| PA2140 |             | probable metallothionein                              |      |       | 6.14  | 0.007 |
| PA2156 |             | putative metal-dependent hydrolase                    | 2.88 | 0.002 |       |       |
| PA2202 |             | probable amino acid permease                          |      |       | -6.35 | 0.000 |
| PA2203 |             | probable amino acid permease                          |      |       | -5.98 | 0.007 |
| PA2204 |             | probable binding protein component of ABC transporter |      |       | -3.30 | 0.001 |
| PA2205 |             | hypothetical protein                                  |      |       | 2.66  | 0.031 |
| PA2211 |             | putative hydrolase                                    | 3.84 | 0.001 |       |       |
| PA2228 |             | hypothetical protein                                  |      |       | 15.10 | 0.003 |
| PA2259 | <i>ptxS</i> | transcriptional regulator PtxS                        |      |       | 2.44  | 0.026 |
| PA2260 |             | hypothetical protein                                  |      |       | 2.50  | 0.004 |
| PA2288 |             | hypothetical protein                                  |      |       | 3.78  | 0.000 |

|        |             |                                                      |       |       |        |       |
|--------|-------------|------------------------------------------------------|-------|-------|--------|-------|
| PA2291 |             | carbohydrate-selective porin                         | 2.42  | 0.000 | 2.25   | 0.001 |
| PA2324 |             | hypothetical protein                                 |       |       | -3.18  | 0.021 |
| PA2328 |             | hypothetical protein                                 |       |       | -2.28  | 0.001 |
| PA2329 |             | probable ATP-binding component of ABC transporter    |       |       | -4.01  | 0.014 |
| PA2337 | <i>mtlR</i> | transcriptional regulator MtlR                       |       |       | 2.13   | 0.002 |
| PA2377 |             | hypothetical protein                                 |       |       | -4.63  | 0.011 |
| PA2383 |             | probable transcriptional regulator                   |       |       | -2.16  | 0.017 |
| PA2384 |             | hypothetical protein                                 |       |       | -4.97  | 0.000 |
| PA2385 | <i>pvdQ</i> | PvdQ                                                 |       |       | -18.74 | 0.001 |
| PA2386 | <i>pvdA</i> | L-ornithine N5-oxygenase                             |       |       | -9.60  | 0.000 |
| PA2389 |             | hypothetical protein                                 |       |       | -5.19  | 0.001 |
| PA2390 |             | probable ATP-binding/permease fusion ABC transporter |       |       | -2.45  | 0.001 |
| PA2391 | <i>opmQ</i> | probable outer membrane protein precursor            |       |       | -7.75  | 0.002 |
| PA2392 | <i>pvdP</i> | PvdP                                                 |       |       | -31.94 | 0.000 |
| PA2393 |             | probable dipeptidase precursor                       |       |       | -5.00  | 0.002 |
| PA2394 | <i>pvdN</i> | PvdN                                                 |       |       | -15.56 | 0.000 |
| PA2395 | <i>pvdO</i> | PvdO                                                 |       |       | -7.55  | 0.001 |
| PA2396 | <i>pvdF</i> | pyoverdine synthetase F                              |       |       | -5.07  | 0.001 |
| PA2397 | <i>pvdE</i> | pyoverdine biosynthesis protein PvdE                 |       |       | -7.66  | 0.001 |
| PA2399 | <i>pvdD</i> | pyoverdine synthetase D                              |       |       | -5.28  | 0.022 |
| PA2400 | <i>pvdJ</i> | PvdJ                                                 |       |       | -10.38 | 0.000 |
| PA2402 |             | probable non-ribosomal peptide synthetase            |       |       | -13.28 | 0.000 |
| PA2407 |             | probable adhesion protein                            |       |       | -2.31  | 0.007 |
| PA2411 |             | probable thioesterase                                |       |       | -8.27  | 0.000 |
| PA2412 |             | hypothetical protein                                 |       |       | -8.60  | 0.000 |
| PA2413 | <i>pvdH</i> | diaminobutyrate--2-oxoglutarate aminotransferase     |       |       | -7.53  | 0.000 |
| PA2418 |             | hypothetical protein                                 |       |       | -2.39  | 0.040 |
| PA2424 | <i>pvdL</i> | PvdL                                                 |       |       | -15.24 | 0.000 |
| PA2425 | <i>pvdG</i> | PvdG                                                 |       |       | -8.19  | 0.000 |
| PA2427 |             | hypothetical protein                                 |       |       | -7.40  | 0.000 |
| PA2428 |             | hypothetical protein                                 | 2.22  | 0.006 |        |       |
| PA2451 |             | hypothetical protein                                 |       |       | -5.38  | 0.000 |
| PA2452 |             | hypothetical protein                                 |       |       | -3.95  | 0.014 |
| PA2469 |             | probable transcriptional regulator                   | -4.06 | 0.000 |        |       |
| PA2505 |             | probable porin                                       |       |       | 2.28   | 0.046 |
| PA2508 | <i>catC</i> | muconolactone delta-isomerase                        |       |       | 2.21   | 0.050 |
| PA2509 | <i>catB</i> | muconate cycloisomerase I                            |       |       | 2.53   | 0.035 |
| PA2513 | <i>antB</i> | anthranilate dioxygenase small subunit               |       |       | 2.11   | 0.037 |
| PA2542 |             | hypothetical protein                                 |       |       | -2.48  | 0.037 |

|        |              |                                                             |       |       |       |       |
|--------|--------------|-------------------------------------------------------------|-------|-------|-------|-------|
| PA2577 |              | probable transcriptional regulator                          |       |       | 2.57  | 0.001 |
| PA2665 |              | anaerobic nitric oxide reductase transcription regulator    |       |       | 3.73  | 0.016 |
| PA2677 |              | probable type II secretion protein                          |       |       | -2.31 | 0.044 |
| PA2694 |              | probable thioredoxin                                        |       |       | -2.84 | 0.027 |
| PA2780 |              | hypothetical protein                                        |       |       | 2.78  | 0.009 |
| PA2782 |              | hypothetical protein                                        |       |       | 2.37  | 0.005 |
| PA2783 |              | hypothetical protein                                        |       |       | 2.34  | 0.043 |
| PA2784 |              | hypothetical protein                                        |       |       | 2.81  | 0.003 |
| PA2787 | <i>cpg2</i>  | glutamate carboxypeptidase                                  |       |       | 2.79  | 0.028 |
| PA2835 |              | putative multidrug efflux MFS transporter                   | -4.52 | 0.000 |       |       |
| PA2844 |              | hypothetical protein                                        |       |       | -2.13 | 0.032 |
| PA2846 |              | probable transcriptional regulator                          |       |       | -2.60 | 0.033 |
| PA2868 |              | hypothetical protein                                        |       |       | 2.75  | 0.029 |
| PA2891 |              | probable biotin carboxylase/biotin carboxyl carrier protein |       |       | -2.23 | 0.049 |
| PA2910 |              | hypothetical protein                                        |       |       | -2.88 | 0.026 |
| PA2917 |              | probable transcriptional regulator                          |       |       | -2.68 | 0.031 |
| PA2927 |              | hypothetical protein                                        |       |       | 3.12  | 0.047 |
| PA2939 |              | probable aminopeptidase                                     |       |       | 3.82  | 0.015 |
| PA3007 | <i>lexA</i>  | LexA repressor                                              |       |       | 3.72  | 0.000 |
| PA3008 |              | hypothetical protein                                        |       |       | 3.50  | 0.000 |
| PA3039 |              | probable transporter                                        |       |       | 2.48  | 0.007 |
| PA3079 |              | hypothetical protein                                        |       |       | -2.48 | 0.002 |
| PA3126 | <i>ibpA</i>  | putative small heat shock protein                           | -3.56 | 0.005 |       |       |
| PA3205 |              | hypothetical protein                                        |       |       | 14.38 | 0.000 |
| PA3206 |              | probable two-component sensor                               |       |       | 2.92  | 0.002 |
| PA3235 |              | hypothetical protein                                        |       |       | -2.18 | 0.001 |
| PA3251 |              | hypothetical protein                                        |       |       | 2.32  | 0.002 |
| PA3253 |              | probable permease of ABC transporter                        |       |       | 3.12  | 0.022 |
| PA3273 |              | conserved hypothetical protein                              | 2.38  | 0.000 |       |       |
| PA3284 |              | hypothetical protein                                        |       |       | 3.12  | 0.002 |
| PA3315 |              | probable permease of ABC transporter                        |       |       | 2.95  | 0.010 |
| PA3320 |              | hypothetical protein                                        |       |       | -2.45 | 0.038 |
| PA3407 | <i>hasAp</i> | heme acquisition protein HasAp                              |       |       | -8.04 | 0.000 |
| PA3413 |              | hypothetical protein                                        |       |       | 2.07  | 0.003 |
| PA3414 |              | hypothetical protein                                        |       |       | 6.48  | 0.007 |
| PA3415 |              | probable dihydrolipoamide acetyltransferase                 |       |       | 2.52  | 0.006 |
| PA3416 |              | probable pyruvate dehydrogenase E1 component, beta chain    |       |       | 2.43  | 0.012 |

|        |              |                                                             |      |       |       |       |
|--------|--------------|-------------------------------------------------------------|------|-------|-------|-------|
| PA3431 |              | hypothetical protein                                        |      |       | 2.49  | 0.035 |
| PA3441 |              | probable molybdopterin-binding protein                      |      |       | -5.62 | 0.001 |
| PA3443 |              | probable permease of ABC transporter                        |      |       | -3.59 | 0.017 |
| PA3499 |              | endonuclease III                                            | 7.22 | 0.002 |       |       |
| PA3508 |              | probable transcriptional regulator                          |      |       | -2.51 | 0.036 |
| PA3532 |              | hypothetical protein                                        |      |       | -2.12 | 0.043 |
| PA3540 | <i>algD</i>  | GDP-mannose 6-dehydrogenase AlgD                            |      |       | 3.09  | 0.000 |
| PA3550 | <i>algF</i>  | alginate o-acetyltransferase AlgF                           |      |       | 2.72  | 0.017 |
| PA3560 | <i>fruA</i>  | phosphotransferase system, fructose-specific IIBC component |      |       | -3.59 | 0.017 |
| PA3575 |              | hypothetical protein                                        |      |       | 5.32  | 0.000 |
| PA3583 | <i>glpR</i>  | glycerol-3-phosphate regulon repressor                      |      |       | -2.27 | 0.004 |
| PA3586 |              | probable hydrolase                                          | 2.06 | 0.000 | 17.30 | 0.000 |
| PA3590 |              | putative 3-hydroxyacyl-CoA dehydrogenase                    | 2.05 | 0.009 |       |       |
| PA3601 |              | hypothetical protein                                        |      |       | 2.40  | 0.004 |
| PA3617 | <i>recA</i>  | RecA protein                                                |      |       | 2.34  | 0.002 |
| PA3633 | <i>ispD</i>  | 2-C-methyl-D-erythritol 4-phosphate cytidylyltransferase    |      |       | -3.08 | 0.022 |
| PA3688 |              | hypothetical protein                                        |      |       | 2.11  | 0.009 |
| PA3712 |              | hypothetical protein                                        |      |       | 2.37  | 0.001 |
| PA3830 |              | probable transcriptional regulator                          |      |       | -3.00 | 0.003 |
| PA3842 |              | probable chaperone                                          | 2.51 | 0.000 |       |       |
| PA3843 |              | hypothetical protein                                        |      |       | -5.50 | 0.008 |
| PA3845 |              | putative transcriptional regulator, LysR family             | 4.32 | 0.000 |       |       |
| PA3870 | <i>moaA1</i> | molybdenum cofactor biosynthesis protein A                  | 2.62 | 0.002 |       |       |
| PA3911 |              | hypothetical protein                                        |      |       | -2.21 | 0.028 |
| PA3914 | <i>moeA1</i> | MoeA1, molybdopterin biosynthesis enzyme                    | 2.35 | 0.009 |       |       |
| PA3915 | <i>moaB1</i> | molybdopterin biosynthetic protein B1                       | 2.31 | 0.038 |       |       |
| PA3935 | <i>tauD</i>  | taurine dioxygenase                                         |      |       | -3.05 | 0.009 |
| PA3957 |              | possible short-chain dehydrogenase                          | 4.00 | 0.000 |       |       |
| PA3959 |              | hypothetical protein                                        |      |       | -2.47 | 0.037 |
| PA4024 | <i>eutB</i>  | ethanolamine ammonia-lyase large subunit                    |      |       | 2.11  | 0.006 |
| PA4110 | <i>ampC</i>  | beta-lactamase precursor                                    |      |       | 2.83  | 0.027 |
| PA4143 |              | probable toxin transporter                                  |      |       | -2.46 | 0.000 |
| PA4144 |              | probable outer membrane protein precursor                   |      |       | -3.16 | 0.003 |
| PA4181 |              | hypothetical protein                                        |      |       | -2.53 | 0.035 |
| PA4218 |              | probable transporter                                        |      |       | -3.50 | 0.001 |
| PA4219 |              | hypothetical protein                                        |      |       | -2.79 | 0.001 |
| PA4220 |              | conserved hypothetical protein                              |      |       | -2.82 | 0.008 |
| PA4221 | <i>fptA</i>  | Fe(III)-pyochelin outer membrane receptor precursor         |      |       | -6.97 | 0.006 |

|        |              |                                                                         |       |       |       |       |
|--------|--------------|-------------------------------------------------------------------------|-------|-------|-------|-------|
| PA4222 |              | probable ATP-binding component of ABC transporter                       | -3.54 | 0.004 | -4.06 | 0.000 |
| PA4223 |              | probable ATP-binding component of ABC transporter                       | -2.77 | 0.001 | -3.85 | 0.012 |
| PA4224 | <i>pchG</i>  | pyochelin biosynthetic protein PchG                                     |       |       | -4.67 | 0.000 |
| PA4225 | <i>pchF</i>  | pyochelin synthetase                                                    |       |       | -5.06 | 0.000 |
| PA4226 | <i>pchE</i>  | dihydroaeruginoic acid synthetase                                       |       |       | -3.15 | 0.000 |
| PA4229 | <i>pchC</i>  | pyochelin biosynthetic protein PchC                                     |       |       | -2.27 | 0.001 |
| PA4230 | <i>pchB</i>  | salicylate biosynthesis protein PchB                                    | -2.93 | 0.000 | -2.83 | 0.001 |
| PA4231 | <i>pchA</i>  | salicylate biosynthesis isochorismate synthase                          |       |       | -3.45 | 0.000 |
| PA4278 |              | conserved hypothetical protein                                          |       |       |       |       |
| PA4281 | <i>sbcD</i>  | exonuclease SbcD                                                        |       |       | -3.04 | 0.023 |
| PA4302 |              | probable type II secretion system protein                               |       |       | -2.69 | 0.030 |
| PA4320 |              | hypothetical protein                                                    |       |       | -2.37 | 0.013 |
| PA4321 |              | hypothetical protein                                                    |       |       | -2.19 | 0.019 |
| PA4357 |              | hypothetical protein                                                    |       |       | -3.79 | 0.001 |
| PA4364 |              | hypothetical protein                                                    |       |       | 3.95  | 0.015 |
| PA4467 |              | hypothetical protein                                                    |       |       | -3.71 | 0.000 |
| PA4468 | <i>sodM</i>  | superoxide dismutase                                                    |       |       | -9.19 | 0.000 |
| PA4469 |              | hypothetical protein                                                    |       |       | -4.59 | 0.000 |
| PA4515 |              | putative iron-regulated protein                                         | 2.42  | 0.004 |       |       |
| PA4525 | <i>pilA</i>  | type 4 fimbrial precursor PilA                                          |       |       | 3.90  | 0.014 |
| PA4582 |              | hypothetical protein                                                    |       |       | 3.45  | 0.002 |
| PA4587 | <i>ccpR</i>  | cytochrome c551 peroxidase precursor                                    |       |       | 3.30  | 0.019 |
| PA4632 |              | putative lipoprotein                                                    | -2.03 | 0.009 |       |       |
| PA4649 |              | hypothetical protein                                                    |       |       | 2.70  | 0.011 |
| PA4652 |              | putative type 1 pili usher protein CsuD                                 | 2.87  | 0.000 |       |       |
| PA4683 |              | hypothetical protein                                                    |       |       | -3.95 | 0.000 |
| PA4707 |              | probable permease of ABC transporter                                    |       |       | -2.59 | 0.003 |
| PA4710 | <i>phuR</i>  | putative haem/haemoglobin uptake outer membrane receptor PhuR precursor | 4.98  | 0.000 |       |       |
| PA4714 |              | hypothetical protein                                                    |       |       | 2.26  | 0.000 |
| PA4763 | <i>recN</i>  | DNA repair protein RecN                                                 |       |       | 2.98  | 0.000 |
| PA4836 |              | hypothetical protein                                                    |       |       | 4.28  | 0.012 |
| PA4837 |              | probable outer membrane protein precursor                               |       |       | 2.41  | 0.009 |
| PA4858 |              | hypothetical protein                                                    |       |       | 2.33  | 0.029 |
| PA4893 | <i>ureG</i>  | urease accessory protein UreG                                           |       |       | 2.13  | 0.041 |
| PA4908 |              | ornithine cyclodeaminase                                                |       |       | 2.51  | 0.021 |
| PA4919 | <i>pncB1</i> | nicotinate phosphoribosyltransferase                                    | 2.09  | 0.008 |       |       |
| PA4980 |              | probable enoyl-CoA hydratase/isomerase                                  |       |       | 3.93  | 0.014 |
| PA5011 | <i>waaC</i>  | heptosyltransferase I                                                   |       |       | -2.29 | 0.002 |



|        |              |                                                       |       |       |       |       |
|--------|--------------|-------------------------------------------------------|-------|-------|-------|-------|
| PA5096 |              | probable binding protein component of ABC transporter |       |       | 2.25  | 0.026 |
| PA5125 | <i>ntrC</i>  | two-component response regulator NtrC                 |       |       | 2.22  | 0.001 |
| PA5169 |              | probable C4-dicarboxylate transporter                 | -3.60 | 0.000 |       |       |
| PA5229 |              | hypothetical protein                                  |       |       | 2.45  | 0.038 |
| PA5294 |              | multidrug efflux protein NorA                         |       |       | 2.73  | 0.029 |
| PA5354 | <i>glcE</i>  | glycolate oxidase subunit GlcE                        | 3.16  | 0.001 |       |       |
| PA5380 |              | probable transcriptional regulator                    |       |       | 2.40  | 0.019 |
| PA5420 | <i>purU2</i> | formyltetrahydrofolate deformylase                    |       |       | 2.24  | 0.048 |
| PA5433 |              | hypothetical protein                                  |       |       | -2.72 | 0.030 |
| PA5439 |              | probable glucose-6-phosphate dehydrogenase            |       |       | 2.16  | 0.009 |
| PA5490 | <i>cc4</i>   | cytochrome c4 precursor                               |       |       | -4.62 | 0.011 |
| PA5509 |              | hypothetical protein                                  |       |       | -2.62 | 0.044 |
| PA5535 |              | hypothetical protein                                  |       |       | 2.36  | 0.012 |
