# Supplementary material
Source: PubMed Central journal article supplement (PMC2737960)
Supplement: supp_191_18_5592__3.pdf [file supp_191_18_5592__3.pdf]

**Supplementary Figure 1A. Classification of swarming-associated genes according to their predicted functions.**

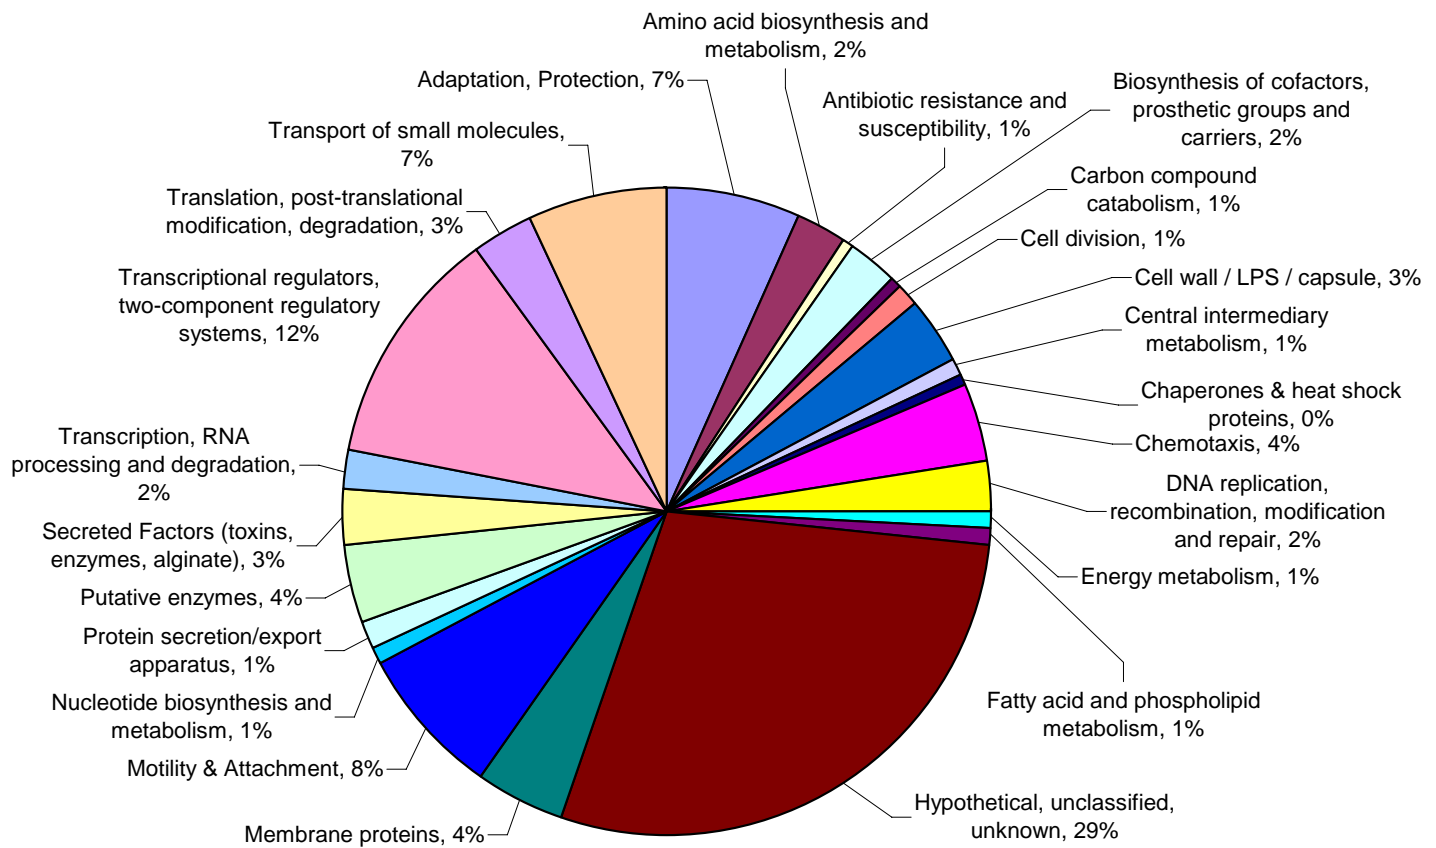

Each gene may be represented more than once.

**Supplementary Figure 1B. Classification of genes from PA14 genome according to their predicted functions.**

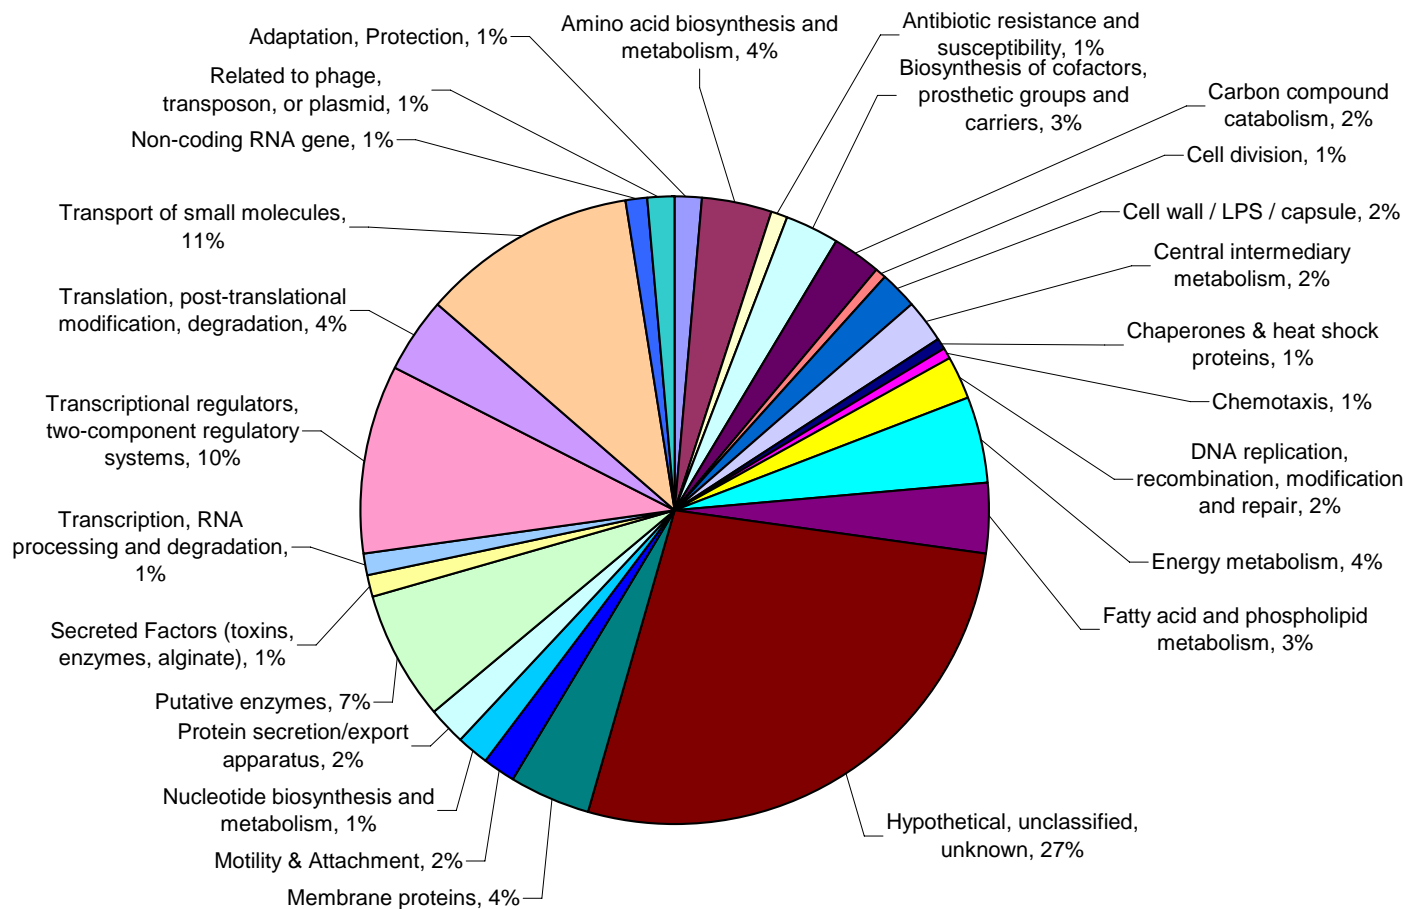

Each gene may be represented more than once.

**Supplementary Figure 1C. Comparison of the functional composition of the swarming-associated genes to the composition of the PA14 genome.**

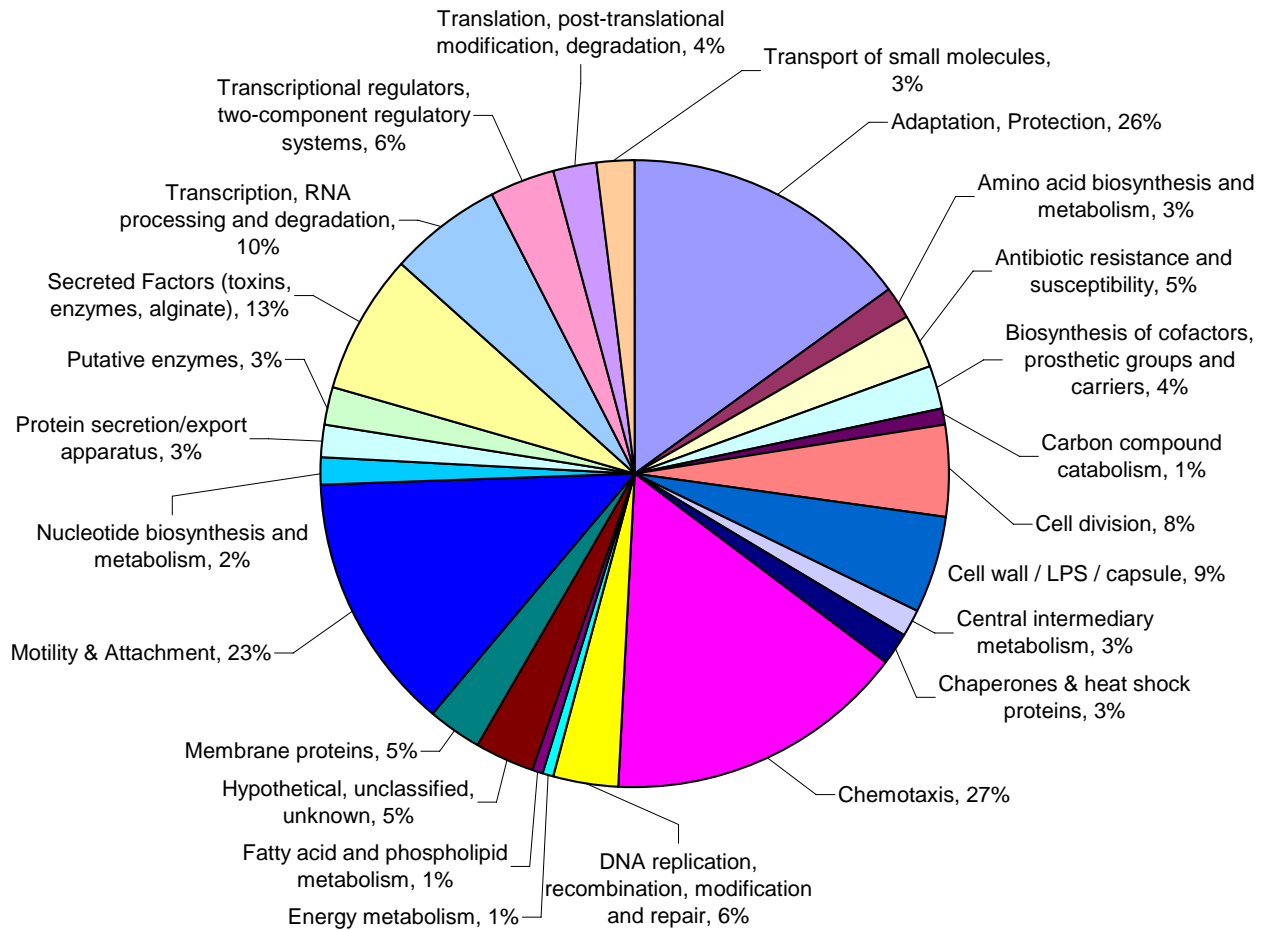

Each gene may be represented more than once.
